# Supplementary material for: Velocity response of Petermann Glacier, northwest Greenland topast and future calving events
Source: Copernicus journal article supplement (doi:10.5194/tc-2018-162), 2018-09-20
Supplement: Supplementary file [file tc-2018-162-AC1-supplement.pdf]

## Author response to comments from two reviewers

**Title:** Velocity response of Petermann Glacier, northwest Greenland to past and future calving events.

**Authors:** Emily A. Hill, G. Hilmar Gudmundsson, J. Rachel Carr, and Chris R. Stokes

**MS number:** tc-2018-162

Dear Editor,

We are very grateful to Ellyn Enderlin and an anonymous reviewer for taking the time to review our manuscript and providing constructive comments. We are also thankful for the insights and comments provided in a short comment by Martin Rückamp. All these comments will greatly improve the content and clarity of our manuscript.

Below we reply to both referee comments and the short comment which are in black text and our responses are in blue. We also include changes made to the manuscript at the end of the document.

Emily Hill and co-authors

## Response to reviewer comment 1: Ellyn Enderlin

Summary: Within the past decade, there have been two very large calving events from the floating ice tongue of Petermann Glacier in NW Greenland. Although the size of the calving events were quite large in terms of aerial extent, they had only a minor influence on ice flow across the grounding line. In this paper, the authors use observations from before and after the 2010 and 2012 calving events to solve for the boundary conditions (both basal and lateral) and viscosity of the glacier in a numerical ice flow model. They then use the observationally-constrained model to simulate the response of the glacier to future calving events of comparable aerial extent. They find that the sensitivity of the glacier to terminus change progressively increases as the terminus retreats towards the grounding line. The increase in sensitivity is due to the increase in both ice thickness and stiffness towards the grounding, which lead to a greater reduction in buttressing as the terminus retreats inland.

Comments: The paper is well written and I see no flaws in the methodology or the interpretation of the results. The exploration of lateral boundary conditions is thorough and is clearly very important for the accuracy of the (past and) future simulations.

We thank Ellyn for taking the time to review our manuscript and for her careful, largely positive, and constructive feedback.

My only somewhat major comment is in regard to clarity in the presentation of the future calving simulations. The results are presented as the nearly instantaneous response of the glacier to the prescribed calving. I have no problem with this analysis but it is not clear whether the calving events are essentially prescribed as one massive calving event of progressively larger size or if there is a relaxation period in between subsequent events. If they are prescribed one immediately after the other, then the results of the sensitivity tests certainly represent the high end-member response of the glacier to calving because you essentially simulate larger and larger calving events with no time for adjustment of the glacier geometry. I feel like this should be made more clear throughout the text.

Thank you for highlighting this ambiguity in the manuscript. We agree that this could be made clearer to the reader. The model experiments were conducted in an entirely diagnostic time-independent mode, in which we remove each segment of the ice tongue immediately after one another. We agree that they could represent the high-end member response, but we are wary of saying that they are definitely higher than the transient response until such experiments have been undertaken. Also, the purpose of this study is not to estimate the long-term transient impact on ice flow and ice discharge but the instantaneous impact of a change in buttressing at the terminus due to removing large sections of the ice tongue. We agree that in reality there is likely to be a period of relaxation and glacier adjustment before another large calving event takes place. We have added a sentence to section 2.5 where we acknowledge this. We have also added another sentence to the end of section 4 where we say highlight that in this study we have only estimated the instantaneous velocity response, and future transient experiments (that we are also currently working on) are needed to estimate the long-term response of Petermann Glacier to future ice tongue loss.

I did not find any glaring typos or places where the text required notable revisions. There were a few instances of tense-switching in the methods, so I recommend checking that you consistently use past tense.

Thank you for highlighting the switching of tenses in the methods. We have now been through and

made sure in all cases we are consistently using the past tense.

I will note, however, that the presentation of the discharge across the grounding line in terms of sea level equivalent should be in mm per year (or  $\text{mm a}^{-1}$ , whatever your preference) since you are talking about a rate and not the cumulative contribution over a set time.

Thank you for highlighting this mistake. We have amended sea level equivalent to  $\text{mm a}^{-1}$  throughout the manuscript, including on the y axis label in Figure 7.

## Response to reviewer comment 2: anonymous reviewer

I am neither glaciologist nor modeler, but physical observations related to force and mass balances in air, oceans, ice constitute my academic bread and butter. My subsequent comments should be read with these biases in mind as I am also unfamiliar with reviewing for Open Access journals such as The Cryosphere. I thoroughly enjoyed reading this manuscript and endorse it for publication, because its language is concise, elegant, and largely clear of disciplinary jargon. The results are novel, exciting, and will stimulate further observational and modeling work at ice shelves in general and those on Greenland like Petermann or 79N Glaciers.

We thank you for taking the time to review our manuscript, for your insightful comments, and for endorsing it for publication. We too are excited by the potential for further ice shelf work to follow this study across the remaining ice tongues in Greenland.

The modeling section-2 is particular clear to me in its detailed and clear discussion of model set-up, initialization, boundary conditions, inversions, limitations, and uncertainties. Nevertheless, an equation or two or three should be given to illuminate both text and results.

Graphics are clear and often free of "chart junk" but the authors can improve their presentation by closer alignment with design principles outlined in [https://www.edwardtufte.com/tufte/books\\_ei](https://www.edwardtufte.com/tufte/books_ei)

Fig.-2 in the present manuscript serves as an example for poor design and Fig.-7 as an example for good design.

We have updated the layout (Fig.2) to align with the design of Fig. 7. We have now plotted observed and modeled speeds on-top of one another for each calving event. We have also updated the figure caption accordingly. Following advice from the short comment by Martin Rückamp we now also show the velocity datasets based on the terminus position for each event.

There are few (minor) quibbles or comments that I have with the manuscript:

(p1, line-23) Khan et al. (2014) is an unfortunate and poor choice to reference the role of sea ice in waters adjacent to glaciers, because the papers merely shows crude (25 km resolution) maps sea ice along with erroneous ocean temperatures (2007 stands out as a particular warm water year off 79 N Glacier in the paper only because no ocean temperatures were collected within 300 km of the coast that year). Furthermore, Khan et al (2014) contains none of the dynamical insights of ice-ocean-glacier interactions such as are provided by Shroyer et al (2017) for Petermann Fjord. Please replace a misleading and poor with a good and relevant reference.

Thank you for highlighting this more appropriate reference to us. We have now replaced the Khan et al. (2014) reference with Shroyer et al. (2017).

(p2, line-16 and line-31) The authors claim repeatedly that Petermann Glacier's drainage area constitutes 6% of the Greenland Ice Sheet (GIS). This number is used incorrectly by many uncritical glaciologists and oceanographers alike. The mistake, I suppose, originates in Rignot and Kanagaratnam (2006) who in their Table-1 list areas of many glacier drainage basins that add up to 1.2 Mil km<sup>2</sup>. This is NOT the total area of the GIS which is closer to 1.7 Mil. km<sup>2</sup> as published by Citterio and Ahlstrom (2013). Using the wrong total area, I get a 6.1% for Petermann, when the correct value is 4.3%. The

Geological Survey of Denmark and Greenland distributes the correct digital ice mask. Please correct this common mistake.

We apologize for including this inaccurate percentage drainage area of Petermann Glacier. We have now updated this to 4% in both instances.

(p2, line-22 and subsequent) More complete glacier velocities from time series of GPS measurements on Petermann Glacier are contained in Muenchow et al. (2016) and a year-long time series in Ahlstrom et al. (2013).

We have added these references into the introduction and in subsequent places in the manuscript where we refer to the fit between our model velocities and previous observations.

(p2, line-31) The rift as a precursor for the next calving can be referenced as Muenchow et al. (2016) who first speculated on the next calving location of Petermann Glacier.

We have now included this reference.

(p6, line-6) Thank you for a wonderful descriptions of different ice flow modeling approaches. May I perhaps ask 2-3 descriptive equations (conservation of mass and momentum as well as stress-law?) that could show me concisely and quickly what kind of dynamics (linear vs. nonlinear, time dependence) are contained. Is "shallow stream" perhaps the same as "shallow water" equations that allow, perhaps, low-frequency wave motions?

We appreciate the suggestion to include descriptive equations. In the text we have now included the momentum equation of the shallow ice-stream approximation. We note that these are not identical to the shallow water equations. However, similarly to the shallow-water equations we do assume the flow to be 'shallow' and we also use an integrated form of the mass conservation equation. On the other hand, our approach includes gradients of horizontal deviatoric stresses that are not included in the shallow water equations.

(p9, line-15) Could not the central channel at Petermann Glacier with its water-filled river in summer partially explain the discrepancies here? Furthermore, the ice-shelf has substantial small scale topography that is captured in both Operation IceBridge radar and altimeter data and to anyone trying to walk on the floating section. It would be amazing (unlikely), if a model could resolve the details of the velocity field of such small scale divergence and convergences in the ice flow of the floating section of the glacier. What would be the role of basal channels in the model and how are they included or not?

While we appreciate that the central channel and small scale topography of the ice shelf could have implications for the distribution of stiff and soft ice across the tongue, we feel that this is beyond the scope of this study, largely because these processes are beyond the resolution of the modelling. These maps of basal slipperiness and ice rheology are inverted from 500m resolution velocities, which would not resolve these small-scale features. Furthermore the element size along the majority of the ice tongue is 0.75 km, which we also assume is too coarse to pick out any of the small scale topographic detail (and therefore stress distribution) associated with the central channel. We also appreciate the importance of the basal channels on the distribution of melt rates beneath the Petermann ice shelf. However, this too is beyond the scope of this study, where we are merely focusing on the buttressing of large portions of the ice tongue. We do not apply any basal melting, nor run any transient time-dependent sim-

ulations. We simply assess the buttressing forces of the tongue on the instantaneous response to large iceberg calving events. If we were to conduct transient time-dependent simulations, which we are planning, melt rates across the ice shelf and within the basal channels would need careful consideration.

(p20, line-4) The Mix et al reference is neither peer-reviewed nor relevant given several peer-reviewed publications that resulted from this expedition, e.g., Jakobsson et al (2018) or Muenchow et al. (2016).

This reference has now been removed from the text and the reference list.

#### References:

- Ahlstrøm, A.P., S.B. Andersen, M.L. Andersen, H. Machguth, F.M. Nick, I. Joughin, C.H. Reijmer, R.S.W. van de Wal, J.P. Merryman Boncori, J.E. Box, and others. 2013. Seasonal velocities of eight major marine-terminating outlet glaciers of the Greenland ice sheet from continuous in situ GPS instruments. *Earth Systems Science Data* 5:277–287, <https://doi.org/10.5194/essd-5-277-2013>.
- Citterio, M. and A.P. Ahlstrom, 2013: The aerophotogrammetric map of Greenland ice masses, *The Cryosphere*, 7, 445-449.
- Muenchow, A., L. Padman, P. Washam, and K.W. Nicholls, 2016: The ice shelf of Petermann Gletscher, North Greenland, and its connection to the Arctic and Atlantic Oceans, *Oceanography*, 29 (4), 84-95.
- Rignot, E. and P. Kanagaratnam, 2006: Changes in velocity of the Greenland Ice Sheet, *Science*, 311, 986-990.
- Shroyer, E.L., L. Padman, R.M. Samelson, A. Muenchow, and L.A. Stearns, 2017: Seasonal control of Petermann Gletscher ice-shelf melt by the ocean’s response to sea-ice cover in Nares Strait.

## Response to short comment: Martin Rückamp

Generally I found the paper very well written with a high level of details. As I am currently working on a similar study, I read the discussion paper with great interest. However, I trapped over the sentence given on Page 15 Line 4-6:

*After accurately replicating the observed velocity response to large calving events in 2010 and 2012, we were confident in the model's ability to predict the future response of Petermann Glacier to further perturbations of the ice tongue.*

I have some concerns with this statement and miss a deeper discussion about the drawback of the model approach (e.g. no geometric adjustment).

We are grateful to Martin for taking the time to read our manuscript and for his helpful and insightful comments in addition to those provided by the reviewers. We appreciate his concerns on a need for deeper discussion and acknowledgement of the limitations with our model approach. We took the advice of Ellyn Enderlin and added a sentence to the methods that acknowledges that these are time independent experiments that are primarily designed to estimate the instantaneous impact of a change in buttressing at the terminus and thus do not allow for any period of relaxation or changes in geometry. With regards to Page 15 lines 4-6, we have now reworded this sentence to back off the ability to accurately forecast the future response (in the absence of any geometric adjustment) and instead say '...model's ability to estimate the instantaneous velocity response of Petermann Glacier to a change in stress conditions at the grounding line associated with removing large sections of the ice tongue.'

I think these points should be addressed with more detail:

1) As already pointed out by the Review of E. Enderlin, your approach lacks the adjustment of glacier geometry. This should be deeper discussed with respect to grounding line flux and speed-up. For instance, your pre-2010 grounding line flux of  $10 \text{ Gt a}^{-1}$  fits well with Rignot and Steffen (2008). They provide a grounding line flux of  $12 \text{ Gt a}^{-1}$  for the pre-2010 calving state. Other than given in your manuscript (Page13 Line1) the Wilson et al. (2017) flux of  $10.8 \text{ Gt a}^{-1}$  refers to the post-2010 calving state (they calculated it as a mean for 2011-2015). So this is not in accordance with the value of  $21 \text{ Gt a}^{-1}$  (Page14 Line10) for your 2010-post calving state. Also, I am wondering how do you get a doubling of grounding line flux from 2010 to 2012 as the ice thickness at the grounding line does not change (due to your model approach) and the speed-up at the grounding line is only minor (Page14 Line5) as PG was dynamically insensitive (Page16 Line 13). Within my model, I only get an increase of the grounding line flux of approx.  $1 \text{ Gt a}^{-1}$  (that is 10%; from  $10.78 \text{ Gt a}^{-1}$  to  $11.86 \text{ Gt a}^{-1}$ ) if I manually impose a speed-up of 10% to the remotely sensed velocities.

This is a good point raised, and we agree that we should consider our model approach (and limitations) more carefully with respect to grounding line flux in particular. Our approach was to present cumulative grounding line flux where we merely summate grounding line flux after each event. This is the reason that the cumulative flux is (*only*) double after the 2012 calving event, because there is little change in the grounding line flux between the two events. We actually get values of  $10.26$  and  $10.47 \text{ Gt a}^{-1}$  after 2010 and 2012 calving events respectively. It seems appropriate that our change in flux would be lower than estimates that allow changes in ice thickness at the grounding line and associated feedbacks. Importantly, we agree and apologize that the way we have presented this to the reader is misleading. Thank you for bringing this mistake to our attention. As also highlighted by Ellyn, our experiments

are effectively prescribing larger calving events each time (by not accounting for any post-event adjustment) and therefore the change in grounding line flux after each event with respect to our initial flux represents the impact of each of these larger calving events. This is also in fact how we have presented our speed-up results, where each change in speed is with respect to our initial pre-calving speeds. We hope to have addressed this quite simply by no longer referring to cumulated total fluxes after each event, but instead we calculate the cumulative difference between each event, and then addition this with our initially (pre-calving) calculated flux of  $10.12 \text{ Gt a}^{-1}$ . This now aligns better with the presentation of our speed up results. We have updated Figure 7 to this effect and have made amendments to the text throughout the results to adjust our flux values to match.

2) The inversion inferred rheology refers to the pre-2010 calving event and aims to mimic stiff and soft zones across the floating tongue. At short timescales it might be valid to keep this field unchanged but on longer timescales (the whole period of your calving events are on decadal timescales, I guess) it is expected that the field changes due to new developing features. The treatment of rheology and impact on results should be at least discussed thoroughly.

We agree that over long time scales that there is likely to be a feedback between changes in geometry and ice rheology. However, here we conduct diagnostic experiments and it is inherent in this approach that there is no evolution of any quantities over time. Thus, there is no need to ‘evolve’ the rheology with time. We are instead merely estimating the instantaneous impact of a change in buttressing forces at the terminus in response to large calving events. Again, we agree that if this was a transient experiment, in which we allow for a periods of relaxation and geometric adjustment, there may be changes in ice rheology to take into account. We have now added an additional sentence to the methods where we stress that alongside no relaxation or geometric adjustment, our ice stress conditions also remain fixed.

Technicalities:

Page4 Line13: Please rewrite, so far we do not have an operating ice thickness radar from satellite for earth observations.

We have removed ‘satellite derived’.

Fig. 2: I am wondering why the velocity profiles for the initial, pre- and pos-2010 (and 2012) events all terminate at the same distance. For instance, after the 2010 event the purple velocity profile should terminate 15 to 20 km earlier than the initially modelled velocities.

Following the advice of anonymous referee 2, we have revised this figure. We have now also now masked the velocity data to demonstrate the different distances at which the glacier terminates after each (2010 and 2012) calving event.

# Velocity response of Petermann Glacier, northwest Greenland to past and future calving events

Emily A. Hill<sup>1</sup>, G. Hilmar Gudmundsson<sup>2</sup>, J. Rachel Carr<sup>1</sup>, and Chris R. Stokes<sup>3</sup>

<sup>1</sup>School of Geography, Politics, and Sociology, Newcastle University, Newcastle-upon-Tyne, NE1 7RU, UK

<sup>2</sup>Department of Geography and Environmental Sciences, Northumbria University, Newcastle-upon-Tyne, NE1 8ST, UK

<sup>3</sup>Department of Geography, Durham University, Durham, DH1 3LE, UK

**Correspondence:** E.A.Hill (e.hill3@newcastle.ac.uk)

## Abstract.

Dynamic ice discharge from outlet glaciers across the Greenland ice sheet has increased since the beginning of the 21st century. Calving from floating ice tongues that buttress these outlets can accelerate ice flow and discharge of grounded ice. However, little is known about the dynamic impact of ice tongue loss in Greenland compared to ice shelf collapse in Antarctica.

5 The rapidly flowing ( $\sim 1000 \text{ m a}^{-1}$ ) Petermann Glacier in north-west Greenland has one of the ice sheet's last remaining ice tongues, but it lost  $\sim 50\text{-}60\%$  ( $\sim 40 \text{ km}$  in length) of this tongue via two large calving events in 2010 and 2012. The glacier showed a limited velocity response to these calving events, but it is unclear how sensitive it is to future ice tongue loss. Here, we use an ice flow model (Úa) to assess the instantaneous velocity response of Petermann Glacier to past and future calving events. Our results confirm that the glacier was dynamically insensitive to large calving events in 2010 and 2012 ( $<10\%$  annual

10 acceleration). We then simulate the future loss of similar sized sections to the 2012 calving event ( $\sim 8 \text{ km}$  long) of the ice tongue back to the grounding line. We conclude that thin, soft sections of the ice tongue  $>12 \text{ km}$  away from the grounding line, provide little frontal buttressing, and removing them is unlikely to significantly increase ice velocity or discharge. However, once calving removes ice within  $12 \text{ km}$  of the grounding line, loss of these thicker and stiffer sections of ice tongue could perturb stresses at the grounding line enough to substantially increase inland flow speeds ( $\sim 900 \text{ m a}^{-1}$ ), grounded ice discharge, and

15 Petermann Glacier's contribution to global sea level rise.

## 1 Introduction

Dynamic ice discharge from marine-terminating outlet glaciers is an important component of recent mass loss from the Greenland Ice Sheet (GrIS) (van den Broeke et al., 2016; Enderlin et al., 2014). Since the 1990s, tidewater outlet glaciers in Greenland have been thinning (Pritchard et al., 2009; Krabill et al., 2000), retreating (e.g. Carr et al., 2017; Jensen et al., 2016;

20 Moon and Joughin, 2008), and accelerating (Joughin et al., 2010; Moon et al., 2012), in response to climate-ocean forcing. Marine-terminating glaciers are influenced by ocean warming (e.g. Holland et al., 2008; Mouginot et al., 2015; Straneo and Heimbach, 2013), increased surface air temperatures (Moon and Joughin, 2008), and reduced sea ice concentration in the fjords ([Amundson et al., 2010](#); [Shroyer et al., 2017](#); [Reeh et al., 2001](#)). However, glacier response to ocean-climate forcing is highly variable between regions and between individual glaciers, due to differences in glacier topography and fjord geometry (e.g.

Bunce et al., 2018; Carr et al., 2013; Porter et al., 2014). Moreover, changes at the terminus of these glaciers (i.e. calving or thinning), can reduce basal and lateral resistance which alters the force balance at the terminus, and causes inland ice flow to accelerate. Indeed, 21st century retreat at two large outlet glaciers in south-east Greenland (Heilheim and Kangerlussuaq) was followed by acceleration and ice surface thinning (Howat et al., 2005, 2007; Nick et al., 2009).

5 Floating ice shelves or tongues that extend out from outlet glacier grounding lines can also control a glacier's response to calving events (Schoof et al., 2017). Floating ice adjacent to the glacier grounding line can buttress inland ice, depending on the amount of shear and lateral resistance provided along the ice shelf margins (Pegler, 2016; Pegler et al., 2013; Haseloff and Sergienko, 2018). Consequently, thinning and retreat of ice shelves can reduce backstress, which can perturb the stresses at the grounding line and propagate increases in driving stress inland causing accelerated ice flow. Understanding how glaciers may  
10 respond to ice shelf loss is therefore important for estimating future flow speeds and, ultimately, their increased contributions to grounded ice discharge and global sea level rise. Considerable work has focused on the role of buttressing ice shelves on grounded ice dynamics in Antarctica (e.g. Schoof, 2007; Gudmundsson et al., 2012; Goldberg et al., 2009; Reese et al., 2018b), but less work has been done on floating ice tongues in Greenland, where large calving events have recently taken place (Hill et al., 2017; Box and Decker, 2011; Rignot et al., 2001).

15 One of the last remaining ice tongues in Greenland is at Petermann Glacier, northwest Greenland. Petermann Glacier is fast flowing ( $\sim 1000 \text{ m a}^{-1}$ ; Figure 1), and drains approximately 64% of the Greenland Ice Sheet by area (Rignot and Kanagaratnam, 2006; Hill et al., 2017). Mass loss is predominantly via high melt rates ( $10\text{-}50 \text{ m a}^{-1}$ ) beneath the ice tongue (Rignot and Steffen, 2008; Wilson et al., 2017), and also occurs via large episodic calving events (Johannessen et al., 2013). Formerly the glacier terminated in a 70 km floating ice tongue, but two well-documented large calving events in 2010  
20 and 2012 removed  $\sim 40 \text{ km}$  of the tongue (Johannessen et al., 2013; Nick et al., 2012; Falkner et al., 2011; Münchow et al., 2014). Contrary to the behavior of glaciers terminating in floating ice elsewhere, large calving events at Petermann Glacier were noted to be followed by minimal glacier acceleration ( $< 100 \text{ m a}^{-1}$ ) (Nick et al., 2012; Münchow et al., 2014) (Nick et al., 2012; Münchow et al., 2014, 2016; Ahlstrøm et al., 2013), suggesting that calving from the seaward parts of the ice tongue appear to have limited impact on flow upstream of the grounding line.

25 Several ice tongues have been lost from neighboring glaciers in northern Greenland since the early 2000s (C. H. Ostfeld, Zacharaie Isstrøm, Hagen Bræ: Rignot et al. 2001; Hill et al. 2017; Mouginot et al. 2015), and with Arctic air and ocean temperatures predicted to increase in a warming climate (Gregory et al., 2004), the question remains: at what point will Petermann Glacier lose its ice tongue and how might its complete removal impact on ice dynamics? Petermann's tongue has been retreating from the end of the fjord ( $\sim 90 \text{ km}$  from the present grounding line) since the beginning of the Holocene  
30 (Jakobsson et al., 2018) and currently resides at its most retreated position in recent history (Jakobsson et al., 2018; Falkner et al., 2011; Hill et al., 2018). More recently (2016), another large rift formed across the ice tongue (Münchow et al., 2016), suggesting another large calving event is imminent. As Petermann Glacier is fast flowing and drains a large area of the GrIS (64%), it has the potential to contribute to increased ice discharge and ultimately sea level rise, once it becomes grounded. Here, we attempt to answer the question: at what point do large calving events from the Petermann ice tongue cause substantial

acceleration (i.e.  $> 100 \text{ m a}^{-1}$  that propagates inland of the grounding line) and increased ice discharge? To do this we use the community finite-element ice flow model Úa (Gudmundsson et al., 2012) to:

- i). Infer the stress conditions beneath the glacier catchment and along the ice tongue walls
- ii). Test whether the recent small changes in velocity following calving events in 2010 and 2012 can be replicated

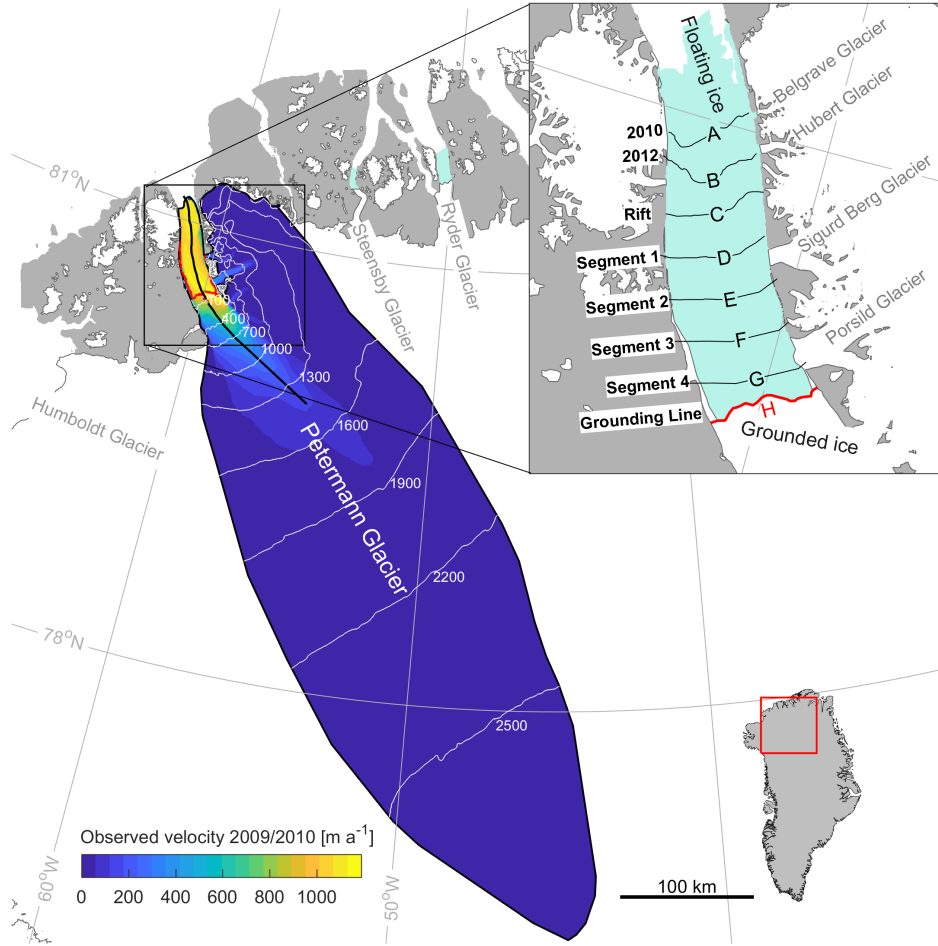

**Figure 1.** Study location, Petermann Glacier, northwest Greenland. Observed ice speeds from the MEaSUREs program (winter 2009/10: Joughin et al. 2010) across the Petermann Glacier catchment, which corresponds with our model domain. White lines show 300 m ice surface contours across the catchment. The thick black line is the glacier centerline and the thick red line is the glacier grounding line. Inset shows the location of newly prescribed terminus positions for each diagnostic perturbation experiment (A-H). Light green shows floating ice, and white is grounded ice.

iii). Assess the future response (acceleration and ice discharge) of Petermann Glacier to further calving events, and eventual entire loss of the remainder of the ice tongue (Figure 1)

First, we initialize the model using observational datasets of surface and basal topography. We then invert observed ice velocities prior to the 2010 calving event to determine the initial basal conditions (slipperiness and rheology of the ice).

5 Finally, we perform a series of diagnostic perturbation experiments where we remove sections of the Petermann Glacier ice tongue and assess the instantaneous glacier acceleration and increase in grounding line ice flux.

## 2 Methodology

### 2.1 Data Input

To initialize our model, we ~~use~~used several observational datasets of glacier geometry and ice velocity. Ice surface topography of Petermann Glacier was taken from the Greenland Ice Sheet Mapping Project (GIMP) Digital Elevation Model (DEM) (Howat et al., 2014). We also used this to calculate the surface drainage catchment, using flow routing hydrological analysis in the MATLAB TopoToolbox (Schwanghart and Kuhn, 2010). The defined catchment is  $\sim 85,000$  km<sup>2</sup>, extends approximately 550 km inland of the grounding line, and encompasses the tributary glaciers flowing into the east side of the Petermann Glacier ice tongue (Figure 1). Ice thickness and basal topography were taken from the Operation IceBridge BedMachine v3 dataset (Morlighem et al., 2017). These data were generated from ~~satellite-derived~~ radar ice thicknesses, ice motion, and the mass conservation method, to resolve the basal topography and ice thickness of the Greenland Ice Sheet (Morlighem et al., 2017). This version also includes high resolution bathymetry of Petermann Glacier fjord seaward of the ice tongue (Jakobsson et al., 2018; Morlighem et al., 2017). All three topographic datasets have a resolution of 150 m, and a nominal date of 2007, which precedes the large calving event in 2010.

20 Firstly, to initialize our model via inversion (see Section 2.3), we ~~require~~required annual ice velocities prior our first experiment, which is the calving event in 2010 (Table 1). These were taken from winter 2009/10 from the Greenland MEaSURES dataset (Table 1: Joughin et al. 2010). This dataset has a resolution of 500 m, and an average error of 8 m a<sup>-1</sup> across the entire Petermann catchment, which increases to 18 m a<sup>-1</sup> along the floating ice tongue (Table 1). To validate our modeled velocity changes in response to calving events in both 2010 and 2012, we ~~require~~required observed velocities from the years preceding and succeeding these events. Velocities from winter 2009/10 (used for inversion), also ~~act~~acted as our baseline velocities that we ~~compare~~compared with observed velocities after each calving event. However, Greenland wide velocities for the winter following the 2010 calving event (2010/11) ~~are~~were not readily available. Instead a series of datasets exist that cover select regions of the ice sheet, derived from feature- or intensity-tracking of optical Landsat imagery (Howat, 2017; Rosenau et al., 2015), or synthetic aperture radar (SAR) imagery (Joughin et al., 2010). We do not use optical Landsat 7 ETM+ derived velocities, because their coverage is restricted to mid-summer, which may reflect seasonal speedups rather than the inter-annual impact of large calving events on ice velocity. Additionally, Landsat derived velocities may have errors associated with cloud cover and or the scanning line correction image banding from May 2003 onwards. Instead, we ~~use~~used a combination of

**Table 1.** Velocity data sources for Petermann Glacier

| Dataset                                   | Year    | Sensor(s)  | Resolution<br>(m) | Catchment<br>Error (m) | Use                         |
|-------------------------------------------|---------|------------|-------------------|------------------------|-----------------------------|
| MEaSURES Greenland wide winter velocity   | 2009/10 | ALOS       | 500               | 8 m a <sup>-1</sup>    | Model inversion             |
| NSIDC (Joughin et al., 2010)              |         | TerraSAR-X |                   |                        | Baseline initial velocities |
| MEaSURES Greenland Ice Velocity: Selected |         |            |                   |                        |                             |
| Selected Glacier Site Velocity Maps from  | 2010/11 | TerraSAR-X | 100               | 4 m a <sup>-1</sup>    | Validate modeled change     |
| NSIDC (Joughin et al., 2010)              |         |            |                   |                        | post-2010 calving           |
| ESA Greenland Ice Sheet CCI project       | 2010/11 | PALSAR     | 500               | 16 m a <sup>-1</sup>   | Validate modeled change     |
| IV Greenland margin winter velocities     |         |            |                   |                        | post-2010 calving           |
| (Nagler et al., 2016)                     |         |            |                   |                        |                             |
| MEaSURES Greenland wide winter velocity   | 2012/13 | RADARSAT-1 | 500               | 3 m a <sup>-1</sup>    | Validate modeled change     |
| NSIDC (Joughin et al., 2010)              |         | TerraSAR-X |                   |                        | post-2012 calving           |
|                                           |         | TanDEM-X   |                   |                        |                             |

SAR derived velocities (TSX and PALSAR) which are not limited to the summer months, and benefit from higher resolution, and more frequent repeat pass imagery (Table 1). High resolution TSX imagery (100 m) was acquired from the MEaSURES program (Joughin et al., 2010), but is limited to 11-45 km inland of the grounding line at Petermann Glacier. To supplement this we also used PALSAR derived velocities (Table 1: Nagler et al. 2016), which ~~provide~~provided additional coverage along the western half of the floating ice tongue. Average errors across the catchment are 4 m a<sup>-1</sup> and 16 m a<sup>-1</sup> for TSX and PALSAR respectively (Table 1). Greenland wide, winter 2012/13 (post-2012 calving event) velocities were also acquired from the MEAsURES program (Table 1: Joughin et al. 2010).

To determine observed velocity change, we ~~difference~~differenced velocity fields after each calving event (2010/11 and 2012/13) from initial baseline velocities (2009/10) (Figure S1). For 2009/10 to 2010/11 speedup along the ice tongue ~~averages~~averaged 29 m a<sup>-1</sup>, but further inland of the grounding line, noisy and unphysical velocity differences (Figure S1) indicate that there was no coherent velocity change, and it is unlikely velocity changes propagated far inland. For clarity we present centerline velocity profiles in Figure 2, which show that increases in speed were limited to the lower portions of the ice tongue. Observed velocity estimates presented here after the calving event in 2010, are within the range of previous studies, which showed a 30-125 m a<sup>-1</sup> speed increase along the ice tongue (~~Johannessen et al., 2013; Nick et al., 2012; Münchow et al., 2014~~) (Johannessen et al., 2013; Nick et al., 2012; Münchow et al., 2016), and limited change further inland (Nick et al., 2012). After the calving event in 2012, velocity increases averaged 79 m a<sup>-1</sup> along the ice tongue, and propagated further towards the grounding line (Figure 2 and Figure S2).

## 2.2 Model Initialization

To model the response of Petermann Glacier to ice tongue loss we ~~use~~used the finite-element model  $\dot{U}a$  (Gudmundsson et al., 2012).  $\dot{U}a$  solves equations of ice dynamics using the shallow ice-stream approximation (SSA) (MacAyeal, 1989; Morland, 1987), a Weertman-sliding law, and Glen's flow law. The ~~model~~momentum equation of the vertically integrated SSA can be

5 written in the form

$$\nabla_{xy} \cdot (h\mathbf{T}) - \tau_{bh} = \rho_i g h \nabla_{xy} s + \frac{1}{2} g h^2 \nabla_{xy} \rho_i, \quad (1)$$

where

$$\nabla_{xy} = (\partial_x, \partial_y)^T, \quad (2)$$

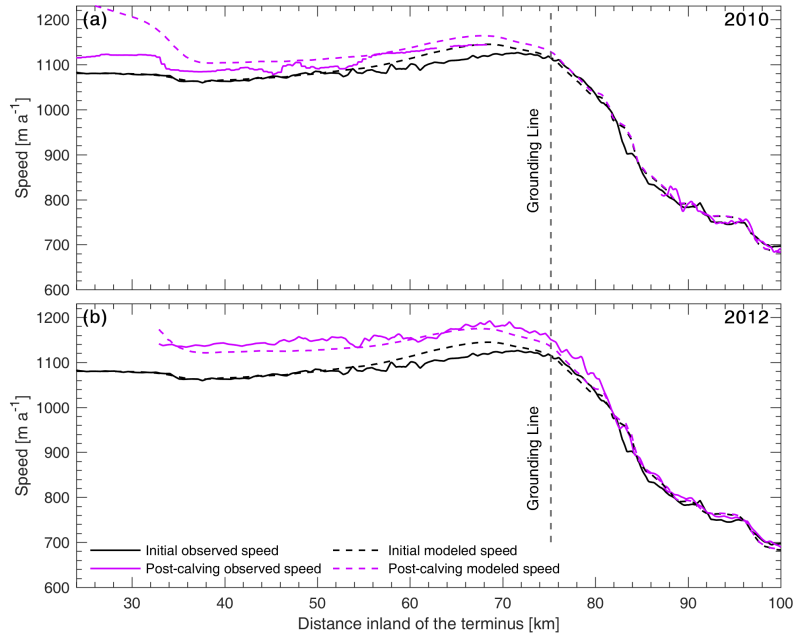

**Figure 2.** Observed and modeled velocities along the Petermann Glacier centerline before and after ~~observed and modeled~~ calving events in 2010 ~~and 2012~~. **a)** ~~observed initial (2009/10: black line) and post-2010 winter velocities (2010/11: purple line).~~ **b)** ~~observed~~. Observed initial speed (MEaSURES InSAR winter 2009/10:–) is shown with a solid black line)–. Observed post-calving speeds after the 2010 calving event (PALSAR and post-2012 TerraSAR-X winter velocities 2010/11) and the 2012 calving event (MEaSURES InSAR winter 2012/13: purple line) are shown with solid purple lines. c) and d) show Modeled initial (speeds are shown in dashed black line)–, and post-calving experiment (speeds after each respective modeled calving event are shown in dashed purple line)– model velocities for 2010 and 2012, respectively. Note the small change in both observed and modeled velocities, particularly inland of the grounding line.

and  $\mathbf{T}$  is the resistive stress tensor defined as

$$\mathbf{T} = \begin{pmatrix} 2\tau_{xx} + \tau_{yy} & \tau_{xy} \\ \tau_{xy} & \tau_{xx} + 2\tau_{yy} \end{pmatrix}. \quad (3)$$

In the above equation  $s$  is the surface topography,  $h$  is the ice thickness,  $p_i$  is vertically averaged ice density,  $g$  is the gravitational acceleration, and  $\tau_{bh}$  is the horizontal part of the bed-tangential basal traction  $\tau_b$ .

$\dot{U}_a$  has been previously used to understand glacier behavior following ice shelf loss in Antarctica (De Rydt et al., 2015), and ice tongue collapse at the Northeast Greenland Ice Stream (Rathmann et al., 2017). It has also been used to assess the impact of buttressing ice shelves around Antarctica (Reese et al., 2018a). Previous modeling studies at Petermann Glacier have been conducted using a one-dimensional flowline approach (Nick et al., 2012). Here we aim to expand on earlier work at Petermann to assess if  $\dot{U}_a$ , a two horizontal dimensional, vertically integrated approach, can also replicate the observed velocity response to calving events in 2010 and 2012, and then be used to estimate the impact of future calving events on ice flow and discharge. This model is advantageous over a flowline approach, as it allows us to account for stresses in both horizontal dimensions, which can better assess the impact of ice shelf changes on the force balance at the glacier grounding line (Gudmundsson, 2013).

To set-up the model, we ~~use~~used the surface velocity catchment (Figure 1) as the outer computational boundary, and ~~impose~~imposed Dirichlet (essential) boundary conditions by fixing velocities to zero inland of the ice divide. Nunataks and rock outcrops along the east side of the ice tongue were digitized using Landsat 8 imagery and treated as holes within the mesh. Ice velocities along the nunataks' boundaries were set to zero, i.e. no-slip boundary condition. Initially, it was less clear what type of boundary condition to impose along the margins of the ice-shelf where it is in contact with the side walls. We began by imposing a free-slip boundary condition along the ice tongue margins, but conducted further runs with no-slip boundary conditions along the side walls to determine which boundary conditions were most appropriate (see Section 2.4).

The initial calving front boundary was the location of the terminus in 2009, digitized from Landsat 7 ETM+ imagery, and in all cases a Neumann (natural) boundary condition was imposed along the terminus. Using this computational domain, and the finite element mesh generator *Gmsh* (Geuzaine and Remacle, 2009), we generated a high resolution mesh, with 58,000 linear (3-node) elements, and  $\sim 30,000$  nodes (Figure S3). The unstructured mesh capabilities of  $\dot{U}_a$  ~~allow~~allowed us to refine the mesh based on the observed velocity field. Where ice speeds are fastest ( $> 500 \text{ m a}^{-1}$ ), primarily along the ice tongue, element sizes are 0.75 km, whereas element sizes inland have a maximum size of 2.7 km. Overall the mean element size is 1.52 km, with a median of 1.4 km. We also ~~increase~~increased the mesh resolution of the slower flowing ( $< 500 \text{ m a}^{-1}$ ) tributary glaciers to the east of the Petermann Glacier ice tongue to 0.75 km. Topographic datasets (surface, bed, and ice thickness), and pre-calving observed ice velocities (winter 2009/10) were mapped onto this mesh using linear interpolation.

## 2.3 Model Inversion

Before modeling changes in the flow speed of Petermann Glacier due to perturbations in the calving front position, we must first estimate the prior stress conditions. We ~~use~~used  $\dot{U}_a$  to invert the known velocity field (winter 2009/10) before the calving event to estimate the basal slipperiness ( $C$ ) and ice rate factor ( $A$ ) across the catchment. We simultaneously invert for parameters of  $C$  and  $A$ . To estimate these parameters,  $\dot{U}_a$  uses a standard methodology whereby a cost function involving a misfit term and a regularization term is minimized. The gradients of the cost function with respect to  $A$  and  $C$  are determined in a computationally efficient way using the adjoint method. Here we used Tikhonov regularization involving both amplitude and spatial gradients of  $A$  and  $C$ . Values of regularization parameters were varied by orders of magnitude between 1 and 10,000, and then within range. We also ~~experiment~~experimented with different sliding law exponent values of  $m$  (1,2,3,4,5,7,9) and ~~find~~found the results of our diagnostic experiments to be insensitive to the value of  $m$  (Figure S3). We set the stress exponent in Glen's Flow law to  $n = 3$ .

To begin with, we ~~invert~~inverted the model using a fixed zero velocity condition along the outer catchment boundary only, and we ~~allow~~allowed the Petermann Glacier ice tongue to have free-slip boundary conditions (Section 2.2). In the following section we discuss two additional inversion experiments where we ~~vary~~varied the boundary conditions along the ice tongue. The model was inverted until the misfit converged which was after 120 iterations. Resultant model velocities ( $U_{\text{mod}}$ ) are in good agreement with observations ( $U_{\text{obs}}$ ) as shown in Figure 3. The mean percentage difference between observed and modeled velocities is 26%, which equates to an absolute difference of  $11 \text{ m a}^{-1}$  (Table 2). Absolute mean velocity difference increases to  $28 \text{ m a}^{-1}$  in areas flowing faster than  $300 \text{ m a}^{-1}$  and to  $66 \text{ m a}^{-1}$  along the floating ice tongue, which is only 7% of the average ice tongue speed ( $967 \text{ m a}^{-1}$ ). Flow velocities are not well resolved along the far north-eastern tributary glacier which is due to thin ice thicknesses and poorly resolved bed topography from interpolation (errors of  $\sim 150 \text{ m}$ ).

By inverting the known velocity field (winter 2009/10), we can infer the basal conditions beneath Petermann Glacier. To our knowledge, a catchment scale assessment of the basal slipperiness and ice stiffness has not been previously documented for this region. Some studies have examined the basal thermal state (MacGregor et al., 2016; Chu et al., 2018), or provided Greenland wide slipperiness estimates (Lee et al., 2015). However aside from these, little is known on the stress conditions of Petermann Glacier. Here, we provide a new record of the basal conditions beneath Petermann Glacier, which are important for understanding dynamic glacier behavior. For our initial inversion, the distribution of basal slipperiness ( $C$ ), ice rate factor ( $A$ ), and the misfit between observed and modeled velocities are shown in the first line of Figure 4. Basal slipperiness was on average two orders of magnitude greater within 10 km of the grounding line ( $C \approx 7.2 \times 10^{-2} \text{ m a}^{-1} \text{ kPa}^{-3}$ ) than the rest of the grounded glacier catchment (mean  $C \approx 1.47 \times 10^{-4} \text{ m a}^{-1} \text{ kPa}^{-3}$ ; Figure 4). Grounded ice across the Petermann catchment is on average stiffer ( $A \approx 1.2 \times 10^{-8} \text{ a}^{-1} \text{ kPa}^{-3}$ ) than along the ice tongue ( $A \approx 7.4 \times 10^{-8} \text{ a}^{-1} \text{ kPa}^{-3}$ ). However, the misfit between observed and modeled velocities is highest along the ice tongue (Figure 4g), which suggests that ice rheology parameter ( $A$ ) may not reflect the true stress conditions along the ice tongue. The distribution of basal slipperiness and ice rheology parameter ( $A$ ) for our initial inversion are discussed in more detail in the following section.

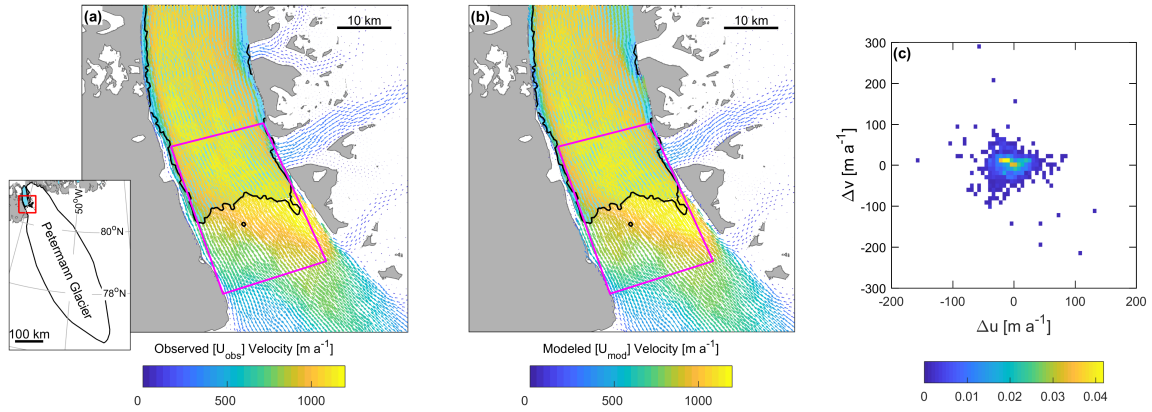

**Figure 3.** Observed ( $U_{\text{obs}}$ ) winter velocities 2009/10 **(a)** in the proximity of the grounding line, **(b)** Modeled ( $U_{\text{mod}}$ ) velocities. **(c)** shows a normalized bivariate histogram of the velocity residuals which are the difference between modeled and observed velocities in the vicinity of the grounding line (magenta).  $\Delta u = u_{\text{modeled}} - u_{\text{observed}}$  and  $\Delta v = v_{\text{modeled}} - v_{\text{observed}}$ .  $u$  and  $v$  are  $x$  and  $y$  components of the velocity vectors respectively.

**Table 2.** Misfit between observed and modeled velocity for each boundary condition scenario

| Boundary Condition Scenario              | Mean<br>percentage<br>difference<br>(%) | Mean<br>velocity<br>difference<br>( $\text{m a}^{-1}$ ) | Mean<br>velocity<br>difference<br>( $>300 \text{ m a}^{-1}$ ) | Mean<br>velocity<br>difference<br>ice tongue<br>( $\text{m a}^{-1}$ ) |
|------------------------------------------|-----------------------------------------|---------------------------------------------------------|---------------------------------------------------------------|-----------------------------------------------------------------------|
| 1. Natural ice tongue boundary           | 26                                      | 11                                                      | 28                                                            | 66                                                                    |
| 2. Fixed west ice tongue margin to zero  | 24                                      | 12                                                      | 34                                                            | 77                                                                    |
| 3. Fixed both ice tongue margins to zero | 20                                      | 9.4                                                     | 25                                                            | 51                                                                    |

## 2.4 Boundary Conditions

In an attempt to improve the misfit between observed and modeled velocities, and accurately replicate the lateral resistive stresses along the ice tongue margins, we conducted runs with both no-slip and free-slip boundary conditions along the side walls. We then tested which ~~produce~~produced the best fit to observed velocities. Alongside our additional inversion (Scenario 1), where no velocity condition was imposed along the ice tongue margins, we inverted the model using two further sets of boundary conditions. These are: Scenario 2) fixed velocities along the western margin of the ice tongue to zero (no-slip) and leave the east margin as free-slip, Scenario 3) fixed velocities to zero (no-slip) along both margins of the floating ice tongue. We then ~~base~~based our assessment of these boundary condition scenarios on three criteria: i) the misfit between observed and modeled velocities, ii) observations of the confinement and attachment of the ice tongue to the fjord walls in satellite imagery

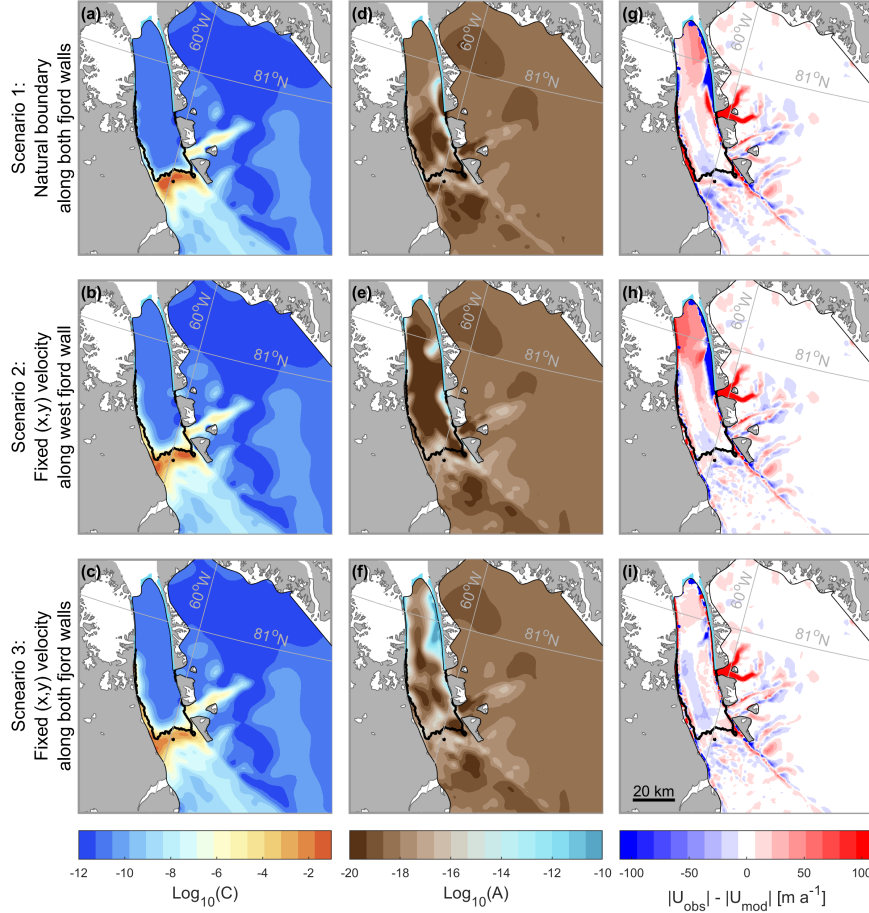

**Figure 4.** Inversion experiments using three sets of boundary conditions along the floating ice tongue. **a-c** show logarithmic calculated basal slipperiness ( $C$ ) for boundary condition Scenarios 1 to 3 respectively, where orange represents highly slippery areas. Glen's flow law rate factor  $A$  (**d-f**), where light blue represents soft ice, and brown is stiff ice. The final column (**g-i**) is the absolute difference between observed ( $U_{\text{obs}}$ ) and modeled velocities ( $U_{\text{mod}}$ ) after inversion using each set of boundary conditions.

(i.e. heavy rifting or not), iii) the ability of each set of boundary conditions to replicate the observed velocity response following the 2010 calving event. The former two criteria are discussed in this section, and the third criterion is discussed alongside our model experiments in the following section (Section 2.5). As before, we perform each inversion for 120 iterations until the misfit has converged, and use the same values of:  $m$ ,  $n$ , and regularization parameters for each scenario. The slipperiness ( $C$ ), ice rate factor ( $A$ ) and misfit distributions ( $|U_{\text{obs}}| - |U_{\text{mod}}|$ ) are shown for each boundary condition scenario in Figure 4. Mean misfits between observed and modeled velocities for each scenario are in Table 2.

Slipperiness values ~~show~~showed a similar spatial distribution across all boundary condition scenarios, i.e. increasing towards the grounding line and decreasing further inland (Figure 4 a-c), and do not vary substantially within 10 km of the grounding line

(range:  $3.8 - 7.2 \times 10^{-2} \text{ m a}^{-1} \text{ kPa}^{-3}$ ) or across the entire grounded catchment (range:  $1.47 - 2.18 \times 10^{-4} \text{ m a}^{-1} \text{ kPa}^{-3}$ ). In contrast, spatial variations in ice stiffness ( $A$ ) ~~are~~ were more obvious between each scenario, which corresponds to differences in the misfit distributions (Figure 4). Average  $A$  values along the ice tongue ~~vary~~ varied by three orders of magnitude between scenarios 1 ( $A \approx 7.4 \times 10^{-8} \text{ a}^{-1} \text{ kPa}^{-3}$ ) and 3 ( $A \approx 1.4 \times 10^{-5} \text{ a}^{-1} \text{ kPa}^{-3}$ ). Scenarios 1 and 2 show stiff ice across the entire ice tongue, which ~~do~~ does not reflect the stiff ice tongue center and weaker margins we would expect from lateral reductions in longitudinal strain rates and ice velocity associated with shearing along the fjord walls (Raymond, 1996). In both cases, velocities do not well reproduce observations along the lateral margins and lower portion of the ice tongue (criterion i: Figure 4 g-h).

In contrast, areas of softer ice ( $A \approx 4.6 \times 10^{-5} \text{ a}^{-1} \text{ kPa}^{-3}$ ) exist along the lateral margins of the lower portion of the ice tongue (Figure 4f) when we ~~use~~ used a no-slip boundary condition along both ice tongue margins during inversion (Scenario 3). In accordance with previous studies (Nick et al., 2012) and our own observations of satellite imagery, this replicates the apparent weak attachment of floating ice to the fjord walls in the lower/eastern parts of the tongue prior to the 2010 calving event (criterion ii). In Scenario 3, overall mean percentage difference between  $U_{\text{obs}}$  and  $U_{\text{mod}}$  ~~is~~ was also improved by 6% and absolute difference reduced by  $15 \text{ m a}^{-1}$  along the ice tongue (Table 2). We find that by imposing a no-slip boundary condition along both side-walls of the ice tongue (Scenario 3) ~~allows~~ allowed the inversion procedure to automatically resolve the weak margins of the tongue. Based on criteria i and ii, this Scenario (3) therefore provides the most realistic distribution of ice softness along the ice tongue (criterion ii) and the best model fit to observed velocities (criterion i). These experiments have shown the importance of considering boundary conditions, particularly along floating ice margins in this study, for accurately determining lateral resistive stresses and replicating the observed velocity field.

## 2.5 Model Experiments

Following model initialization and inversion, we ~~perform~~ performed a series of diagnostic experiments (Figure 1) that perturb the calving front position to replicate previous large calving events and potential future loss from the Petermann Glacier ice tongue. We then examine the instantaneous velocity change with respect to our initial modeled velocities. As the focus of this paper is the impact of large calving events on glacier velocity, we do not incorporate ice loss via surface and/or basal melting. For each perturbation experiment, we ~~remove~~ removed all elements from the mesh downstream of the new calving front position, and ~~map~~ mapped all topographic datasets onto the new mesh. We then ~~perform~~ performed a forward-diagnostic model run, which solves the ~~ice dynamic equations~~ shallow ice-stream equations (see Eq. 1) independent of time. In each case, the model is restarted from the previous experiment set up. During all experiments, grounding line position, boundary conditions, and ice thickness ~~remain fixed~~ remained fixed. We also use our initially inverted parameters of basal slipperiness and ice rheology as inputs to all experiments. We acknowledge that in reality there is likely to be a period of relaxation and geometric adjustment after each individual calving event. Thus, by performing these sequential calving experiments in a diagnostic time-independent mode, we are only modeling the immediate velocity change in response to a perturbation in buttressing at the terminus. We therefore do not allow any relaxation/adjustment or deviation from our initial stress conditions

(slipperiness or rheology) in between subsequent events. It is therefore possible that these estimates of ice flow and discharge may be higher than the transient glacier response over longer timescales.

~~We start~~

~~We started~~ by removing sections of the ice tongue that calved in 2010 and 2012 (Figure 1), for which the new terminus positions were digitized from Landsat ETM+ imagery from 31st August and 21st July respectively. We then ~~assume-assumed~~ that the next iceberg to calve from the tongue will follow the path of the rift that formed in 2016. Then, we ~~estimate-estimated~~ the glacier response to future calving events, following two assumptions: i) Petermann Glacier will continue to calve episodically, via rift propagation, back to the grounding line, ii) that future icebergs will be similar sized to previous calving events ( $\sim 8$  km long; Figure 1). Each segment along the ice tongue ~~acts-acted~~ as the new prescribed terminus position, which has a natural boundary condition. In reality, the size and nature of future calving events may vary (e.g. may be a series of small icebergs), but we conduct these experiments to assess the impact of future events similar in magnitude to previous calving. After each diagnostic experiment we ~~calculate-calculated~~ the vertically and horizontally integrated flux across the grounding line in Gt ~~and~~  $\text{a}^{-1}$  with respect to pre-calving flux. We then convert to sea level equivalent (mm) by dividing by the volume of ice needed to raise global sea levels by 1 mm (361.8 Gt).

For the first diagnostic experiment, we ~~use-used~~ all three sets of boundary conditions (Scenarios 1-3) proposed in Section 2.4 to fulfill our third criterion (iii) of which scenario best replicates the small increase in velocity observed after the 2010 calving event (Figure 5). Basal slipperiness ( $C$ ), ice rate factor ( $A$ ), and boundary conditions for each scenario were input into this first experiment (2010 calving) and the instantaneous increase in speed presented in Figure 5. We found that the differences in modeled velocity changes due to calving were relatively small, and the results, hence insensitive to the type of boundary condition applied (see also Section 2.4). This insensitivity to the type of side-wall boundary conditions can be understood to be related to our inverse methodology (see Section 2.3), where  $A$  is inferred from measured velocities. In all cases the inversion was able to converge and provide a good fit to observations. Despite this, applying no resistance along the ice tongue margins (Scenario 1: free slip), produces no change in velocity along the tongue, which does not reflect observations (Figure 2 and Figure S1). However when applying no-slip side-wall boundary conditions, modeled speed increases along the ice tongue (Scenarios 2 and 3) ~~produce-produced~~ a better fit to observed changes i.e. acceleration at the terminus that ~~does~~ did not propagate far inland, and average  $45$  and  $37 \text{ m a}^{-1}$  respectively. While both Scenarios 2 and 3 appear to adequately reproduce the observed velocity response after the 2010 calving event, we discount Scenario 2 due to the high misfit between modeled and observed velocities (Table 2), and unrealistic ice stiffness along the tongue (Figure 4). Thus, boundary conditions and parameters of basal slipperiness ( $C$ ) and ice rate factor ( $A$ ) calculated in Scenario 3 are input into our subsequent diagnostic experiments post-2010.

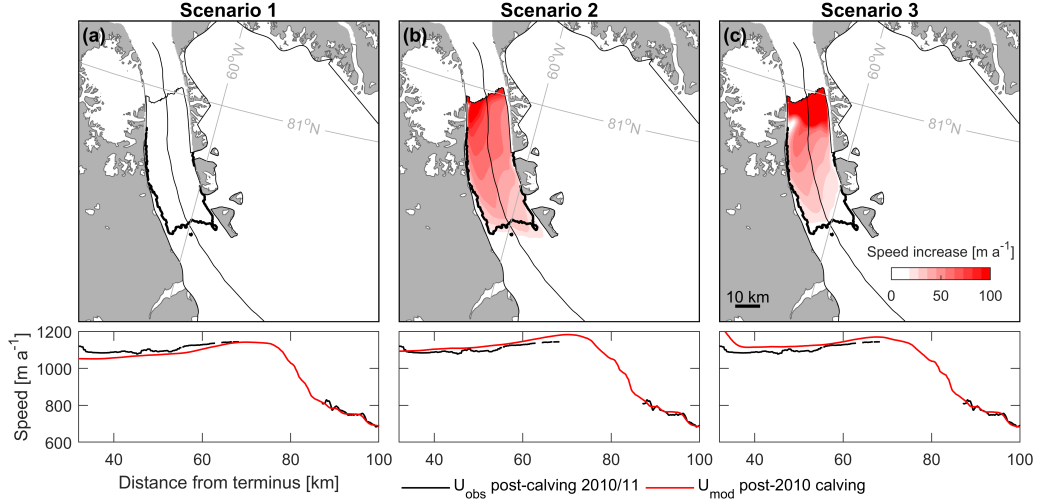

**Figure 5.** Diagnostic perturbation experiments for the 2010 calving event, using three scenarios of boundary conditions applied along the floating ice tongue (a-c). Graduated white to red shows speed increase between initial modeled velocities ( $U_{\text{initial}}$ ) and modeled velocities post-2010 calving ( $U_{\text{calving}}$ ). Bottom plots show observed velocities ( $U_{\text{obs}}$ ) post-calving (winter 2010/11), and modeled velocities ( $U_{\text{mod}}$ ) post-2010 calving along the glacier centerline.

### 3 Results

#### 3.1 Response to 2010 and 2012 calving

We have shown that the 2-HD model  $\hat{U}_a$  can reproduce the flow of Petermann Glacier before the large calving event in 2010. Following this we removed sections of the ice tongue, to replicate large calving events in 2010 and 2012, and compare the model results with observed changes in flow speeds (Figure 6a and b).

The iceberg that calved away from Petermann Glacier in 2010 was  $\sim 214 \text{ km}^2$  and on average 83 m thick (Figure 6). Inverted ice rate factor  $A$  reveals that this section of the tongue is softer ( $A \approx 2.1 \times 10^{-5} \text{ a}^{-1} \text{ kPa}^{-3}$ ) by three orders of magnitude than the rest of the ice tongue (Figure 7b) or grounded glacier catchment ( $A \approx 1.2 \times 10^{-8} \text{ a}^{-1} \text{ kPa}^{-3}$ ). Model results show that removing this section of the tongue was followed by a slight instantaneous increase in speed, ranging from  $\sim 65 \text{ m a}^{-1}$  (6% increase of tongue speed) at the terminus, to  $< 20 \text{ m a}^{-1}$  between 60 and 80 km along the centerline (Figure 6a). These modeled velocity changes are in very good agreement with observed velocities presented here (Figure 2), and documented in previous studies (Nick et al., 2012; Münchow et al., 2014) (Nick et al., 2012; Münchow et al., 2016). After the 2010 calving event increases in speed across the entire ice tongue averaged  $29 \text{ m a}^{-1}$  and  $37 \text{ m a}^{-1}$  in observed and modeled velocities respectively (Figure 2). Modeled perturbations in flow speeds did not propagate far inland and averaged only  $+6 \text{ m a}^{-1}$  inland of the grounding line, which is below the average misfit between observed and modeled velocities ( $9.4 \text{ m a}^{-1}$ : Table 2) and therefore indistinguishable from errors. Prior to the calving event, our modeled grounding line flux of  $10.12 \text{ Gt a}^{-1}$  was within

the range of previous estimates by Rignot and Steffen (2008) ( $12 \pm 1 \text{ Gt a}^{-1}$ ) and Wilson et al. (2017) ( $10.8 \pm 0.52 \text{ Gt a}^{-1}$ ). Limited changes in speed following the 2010 calving event were accompanied by little change in modeled grounding line flux ( $+0.14 \text{ Gt a}^{-1}$ ) and a negligible increase in sea level rise contribution (Figure 7b).

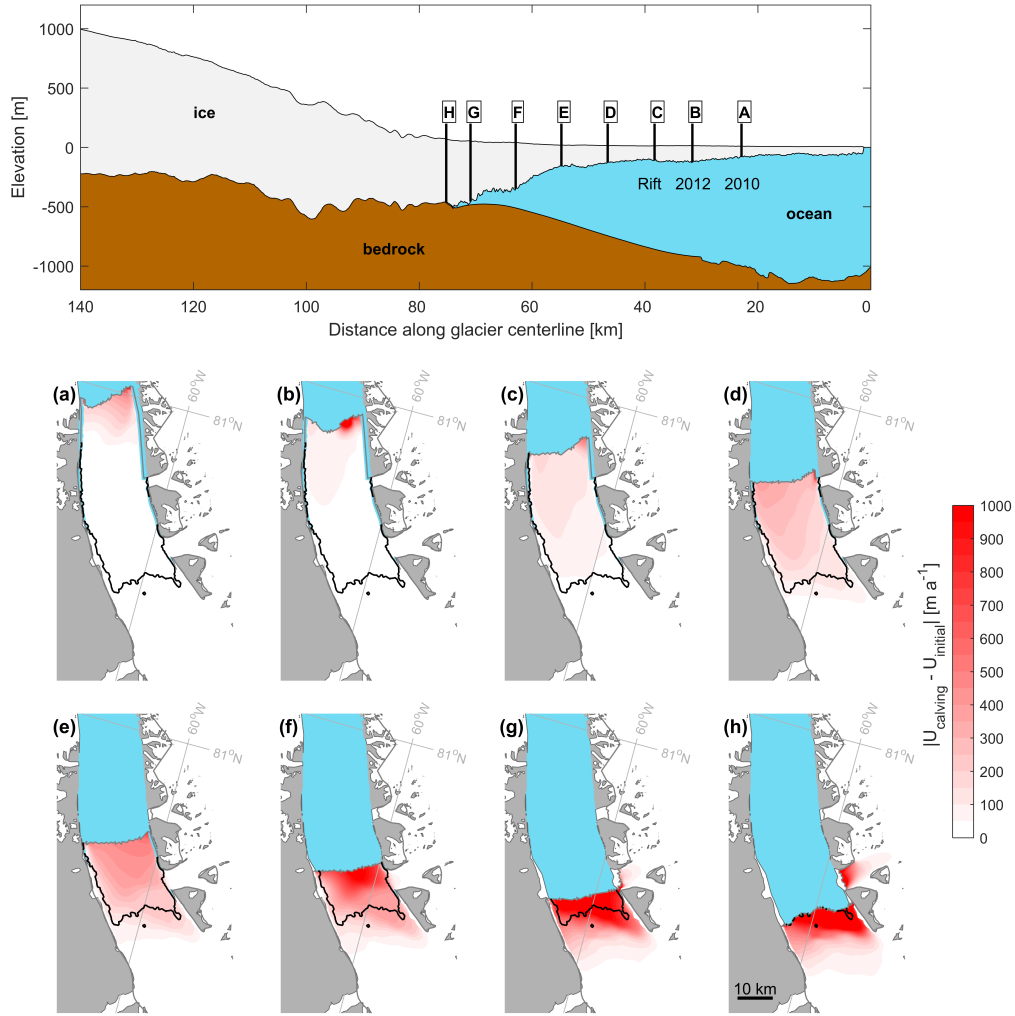

**Figure 6.** Diagnostic perturbation experiments at Petermann Glacier. Top panel shows a cross-sectional centerline profile of Petermann Glacier from the BedMachine v3 dataset (Morlighem et al., 2017). Letters A to H represent sections of the terminus removed for each experiment. A is the 2010 calving event, B is the 2012 calving event, and C is the location of a large rift that formed in 2016. D to G are successive 8 km splices and H is the current grounding line location. Bottom panels (a-h) show the modeled instantaneous increase in speed after each experiment with respect to initial pre-calving (before 2010) speeds.

In the next experiment, we removed a 96 km<sup>2</sup> section of the ice tongue to replicate a subsequent large calving event in July 2012. Importantly this calving event removed a thicker section of the ice tongue that averaged 111 m (Figure 7a). Similar to the modeled dynamic response after 2010, ice flow speeds increased along the ice tongue after the 2012 calving event, and did not propagate far inland of the grounding line (Figure 6b). These modeled velocity changes are consistent with observed velocities in 2012/13 (Figures 2 and S2). Both modeled and observed speeds increased within the range of 3-5% at the terminus, and showed limited change inland of the grounding line (Figure 2). The 2012 calving event was <50% of the 2010 iceberg area, and almost four times softer ( $A \approx 9.7 \times 10^{-5} \text{ a}^{-1} \text{ kPa}^{-3}$ ), suggesting it should provide less resistive stress. However, speed increases were 46% greater along the ice tongue than in 2010 (averaging 59 m a<sup>-1</sup>) and propagated further towards the grounding line. ~~Alongside greater~~ Despite some acceleration, the 2012 calving event ~~also had a larger~~ had a limited impact on grounding line flux, ~~doubling it to 21~~ increasing it by only 0.35 Gt a<sup>-1</sup> ~~and increasing sea level contribution to 0.06 mm~~ compared to initial ice flux, and increased sea level rise contribution to 0.029 mm a<sup>-1</sup> (Figure 7b).

### 3.2 Response to future calving events

Calving events in 2010 and 2012 had a limited dynamic impact on the ice flow of Petermann Glacier and were followed by <10% acceleration along the ice tongue, and <2% at the grounding line (Figure 2). These modeled findings are consistent with observed velocity change (Figure 2) and previous modeling of the 2010 calving event (Nick et al., 2012). After accurately replicating the observed velocity response to large calving events in 2010 and 2012, we were confident in the model's ability to ~~predict the future~~ estimate the instantaneous velocity response of Petermann Glacier to ~~further perturbations~~ a change in stress conditions at the grounding line associated with removing large sections of the ice tongue.

We conducted six further experiments to analyze the glacier dynamic response (instantaneous change in flow speeds) and grounding line flux, to large calving events. Each of the new calving front positions were approximately 8 km apart along the tongue, and ice loss area averages 125 km (Figure 7a). First, we assume that the next calving event from Petermann Glacier will fracture along the path of a large rift that formed in 2016, removing a ~154 km<sup>2</sup> section of the ice tongue (Experiment C: Figure 6). This segment is also on average 35 m thicker and sturdier ( $A \approx 8.3 \times 10^{-6} \text{ a}^{-1} \text{ kPa}^{-3}$ ) than the downstream section of the tongue that collapsed in 2010 and 2012 (Figure 7b). In this case, average increases in speed along the ice tongue were greater (94 m a<sup>-1</sup>) and propagated further (~30 km from the terminus) towards the grounding line than after previous calving events (Figure 6). Acceleration 10 km inland of the grounding line was double +24 m a<sup>-1</sup> the acceleration after the 2012 calving event. Despite this, acceleration inland of the grounding line remained 75% smaller than increases along the ice tongue (Figure 7c), and did not propagate far into the glacier catchment (Figure 6c). After this experiment grounding line flux increased ~~again~~ to 31 to 11 Gt a<sup>-1</sup> (+0.87 Gt a<sup>-1</sup>) and sea level equivalent rose to ~~0.09 mm~~ 0.03 mm a<sup>-1</sup> (Figure 7b).

Over the subsequent diagnostic calving experiments (D-H), there was a linear increase in average speed change across the ice tongue, as well as a near doubling of average speed increases immediately inland of the grounding line (within 10 km) between each experiment (Figure 7). After removing the 164 m thick section D from the tongue, average ice tongue speeds increased by 21% compared to initial velocities (~954 m a<sup>-1</sup>), but increases inland of the grounding line (within 10 km) remained small in comparison (~+57 m a<sup>-1</sup>). During the following three experiments (E-G), instantaneous average velocity

increases across the tongue were more substantial than after previous calving events ranging from  $304 \text{ m a}^{-1}$  after removing segment E, to increasing by  $+1000 \text{ m a}^{-1}$  ( $> 100\%$  of initial flow speeds) across the small remaining section of the ice tongue after Experiment G. Throughout these experiments, higher magnitude increases in speed propagated further into the catchment ( $\sim 10\text{-}15 \text{ km}$  inland of the grounding line) than after previous calving events (Figure 6). Simultaneous to increases along the ice tongue, average speed increases inland of the grounding line ( $10 \text{ km}$ ) went from  $103 \text{ m a}^{-1}$  (Experiment E) to  $453 \text{ m a}^{-1}$  (Experiment G; Figure 7). Once the last remaining section of the ice tongue was removed ( $54 \text{ km}^2$ : H), speed increases were double that of Experiment G, reaching  $+900 \text{ m a}^{-1}$  immediately inland of the grounding line ( $10 \text{ km}$ ). Removing the entire ice tongue, and consequently detaching it from any tributary glaciers also led to a  $\sim 530 \text{ m a}^{-1}$  speed up at the terminus of Porsild Glacier (Figure 6h).

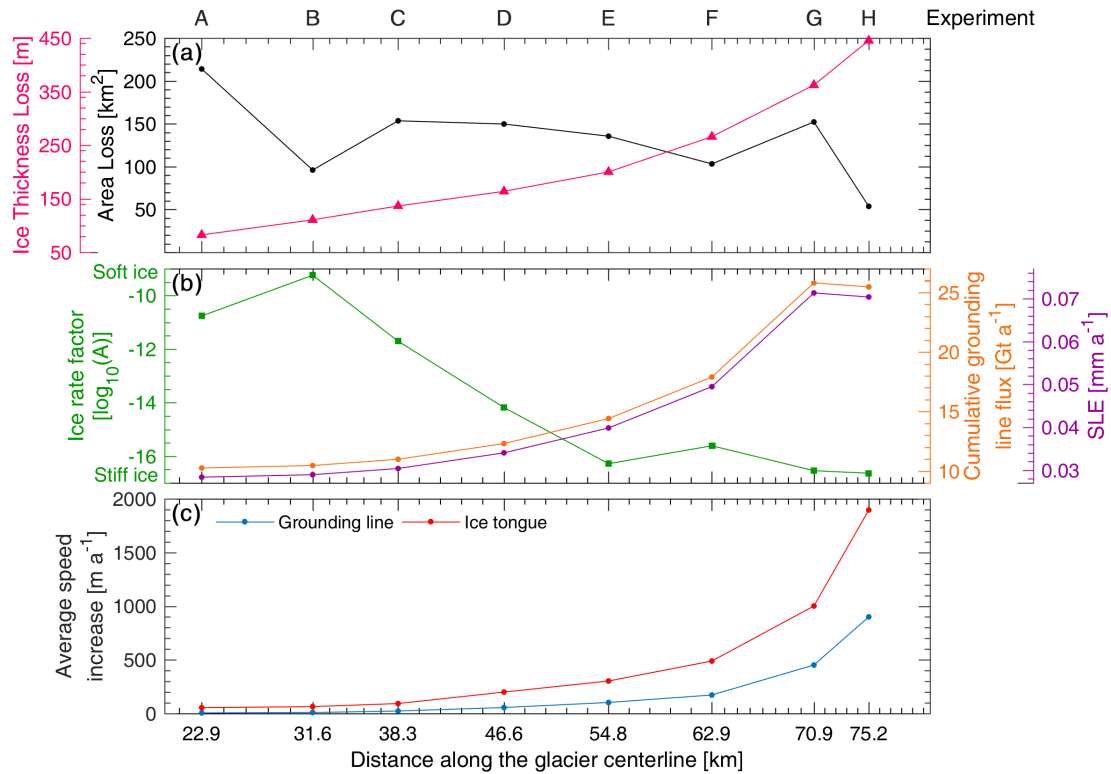

**Figure 7.** Modeled experiment parameters for Petermann Glacier, for each diagnostic experiment (A-H), also shown in Figure 6. **(a)** Black line shows iceberg area lost between each experiment [ $\text{km}^2$ ] and magenta is the average ice thickness [m] of each section of ice removed. **(b)** green is the average ice rate factor [ $\log_{10} A$ ] across the section of ice removed in each diagnostic experiment. Orange and purple lines represent the cumulative change in grounding line flux with respect to an initial ice flux of  $10.12 \text{ Gt a}^{-1}$  and sea level equivalent contribution after the removal of each section of ice. **(c)** Average increases in ice speed across the entire ice tongue (red) and average ice speed within  $10 \text{ km}$  inland of the grounding line (blue) after each diagnostic experiment.

Alongside linear increases in speed after large calving events, we also note positive trends in the thickness of each calved iceberg, grounding line discharge, and sea level equivalent (Figure 7). Ice thickness along the Petermann Glacier tongue increases from  $\sim 50$  m towards the terminus to  $\sim 500$  m at the grounding line (Figure 6: Münchow et al. 2014). In our experiments, the ice thickness of each segment increased by an average of 221 m (Figure 7a). At the same time, grounding line discharge increased by an average of  $+10\text{--}2.17$  Gt  $\text{a}^{-1}$  after each experiment and once the entire ice tongue was removed, cumulative grounding line flux reached  $96\text{--}25$  Gt  $\text{a}^{-1}$  and the glacier contribution to sea level rise increased to approximately  $0.27\text{--}0.07$  mm per year (Figure 7b). As well as increases in ice thickness along the ice tongue, there is also a general increase in the stiffness of the ice back towards the grounding line. The ice is generally soft in the lower  $\sim 40$  km of the tongue (Figure 4f) before ice rate factor ( $A$ ) values decrease by 1-2 orders of magnitude during the last five experiments (E-H: Figure 7b). Importantly grounded ice immediately inland of the grounding line (within 10km) is stiffer than the entire ice tongue.

#### 4 Discussion and Conclusions

Here, we expand on previous work and provide new insight into the velocity response of Petermann Glacier to past and future large calving events, and eventual ice tongue collapse. In contrast to the removal of buttressing ice shelves elsewhere in Greenland (e.g. Jakobshavn Isbræ: Joughin et al. 2008; Zacharaie Isstrøm: Mouginit et al. 2015) and from the Antarctic Peninsula (e.g. Larsen B: De Rydt et al. 2015; Scambos et al. 2004), we show that Petermann Glacier was dynamically insensitive to the removal of  $\sim 310$  km<sup>2</sup> of the ice tongue via calving events in 2010 and 2012 (Figure 6). After both calving events there was a limited increase in speed ( $< 10\%$  of initial flow speeds: Figure 2), that remained below the  $\sim 22\text{--}25\%$  seasonal variability in flow speeds observed between 2006 and 2017 (Nick et al., 2012; Lemos et al., 2018). This insensitivity of ice velocities to large calving events can be explained by weak resistance provided by the lower portion of the ice tongue along its lateral margins (Figure 4f: Nick et al., 2012). From this, we can conclude that the section of the ice tongue that calved away in 2010 and 2012 provided little frontal buttressing on grounded ice.

Given that several floating ice tongues have been lost from neighboring glaciers in northern Greenland (Hill et al., 2018), and the rapid nature of Petermann Glacier's Holocene retreat from the fjord mouth (Jakobsson et al., 2018), it is possible that the ice tongue will continue to calve episodically, and in the not too distant future collapse entirely. We set out to determine at what point future calving events at Petermann Glacier (similar in magnitude to past calving) will cause substantial acceleration and increased ice discharge. The key conclusion of this work is that future calving events (C-E) from the lower portions of the ice tongue ( $> 12$  km from the grounding line) appear to be passive. We attribute the small modeled velocity response ( $< 100$  m  $\text{a}^{-1}$  increase at the grounding line) to calving events from this lower portion of the tongue to be due to thinner ( $< 200$  m) and an order of magnitude softer ice, which provides limited buttressing on grounded ice. Indeed, if the next calving event takes the path of the 2016 rift formation, it is unlikely to substantially accelerate ice flow (Figure 6c), or increase the glacier contribution to grounded ice discharge and sea level rise (Figure 7). However, we find that removing sections of the ice tongue within 12 km of the grounding line (F-H) has a larger impact on ice flow speeds, increasing them by an average of 900 m  $\text{a}^{-1}$  (96%) after the entire ice tongue is removed (Figure 6h). Alongside this, cumulative ice flux across the grounding line increases from  $34$

11 Gt a<sup>-1</sup> (Experiment C) to ~~96-25~~ Gt a<sup>-1</sup> (H: Figure 7b) and cumulative sea level rise could reach ~~0.27 mm~~ 0.07 mm a<sup>-1</sup> (for event H). Importantly, within 12 km of the grounding line, the thickness and stiffness of the ice tongue increase dramatically (Figure 7). As such, this part of the ice tongue provides greater lateral resistance along the fjord walls and is therefore more effective at buttressing grounded ice. Removing these sections of ice is thus likely to alter the resistive stresses at the grounding

5 line enough to cause a greater increase in flow speeds that propagate further inland.

Overall, our findings show that Petermann Glacier has not responded dynamically to previous calving events in 2010 and 2012, and is unlikely to accelerate substantially after imminent future calving events (Figure 6c). However, future large episodic calving events closer to the grounding line have the potential to perturb the stresses acting on grounded ice, and substantially increase flow speeds and ice discharge (Figure 7). Despite substantial increases in speed forecast after the ice tongue is removed,

10 the question remains as to whether acceleration will be short-lived, and the glacier will re-stabilize at the current grounding line position or retreat inland. Similar to when the glacier was buttressed by an ice shelf at the end of the fjord (Jakobsson et al., 2018), it may be that the current ice tongue has allowed grounding line stability, and its collapse will similarly lead to unstable grounding line retreat. Indeed, the eastern portion of the current grounding line lies within a deep bedrock canyon (Bamber et al., 2013; Morlighem et al., 2017), which may allow for marine ice sheet instability. However, we cannot discount

15 the possibility that an ice tongue may regrow in the future (Nick et al., 2012). Here, we have estimated the instantaneous response of Petermann Glacier's ice flow to the immediate removal of sections of the ice tongue. Importantly, future work ~~is needed on incorporating~~ the transient evolution of the ~~grounding line to assess its stability under future warming scenarios that also incorporate the effect of basal/surface melt and hydrology on calving front evolution.~~ glacier geometry and grounding line position in between these large calving events is needed to assess the long-term response of Petermann Glacier to future ice

20 tongue loss.

*Author contributions.* This work was carried out by E. Hill with input from all authors. E. Hill led the manuscript writing, and all authors contributed towards editing the manuscript.

*Competing interests.* The authors declare that they have no conflict of interest.

*Acknowledgements.* We acknowledge several freely available datasets used in this work. These are: the IceBridge BedMachine v3 (Morlighem et al., 2017) and MEaSUREs InSAR ice velocities (Joughin et al., 2010) both from the National Snow and Ice Data Center (NSIDC), and PALSAR derived velocities from the ESA Greenland Ice Sheet Climate Change Initiative (Nagler et al., 2015). This work was supported by a Doctoral Studentship award to E. Hill at Newcastle University, UK from the IAPETUS Natural Environment Research Council Doctoral Training Partnership (grant number: NE/L002590/1). E. Hill was also additionally supported by a CASE partnership from the British Antarctic Survey.

25

## References

- Ahlstrøm, A. P., Andersen, S. B., Andersen, M. L., Machguth, H., Nick, F. M., Joughin, I., Reijmer, C. H., Van De Wal, R. S., Merryman Boncori, J. P., Box, J. E., Citterio, M., Van As, D., Fausto, R. S., and Hubbard, A.: Seasonal velocities of eight major marine-terminating outlet glaciers of the Greenland ice sheet from continuous in situ GPS instruments, *Earth System Science Data*, 5, 277–287, <https://doi.org/10.5194/essd-5-277-2013>, 2013.
- Amundson, J. M., Fahnestock, M., Truffer, M., Brown, J., Lüthi, M. P., and Motyka, R. J.: Ice mélange dynamics and implications for terminus stability, Jakobshavn Isbrse, Greenland, *Journal of Geophysical Research: Earth Surface*, 115, 1–12, <https://doi.org/10.1029/2009JF001405>, 2010.
- Bamber, J. L., Griggs, J. A., Hurkmans, R. T. W. L., Dowdeswell, J. A., Gogineni, S. P., Howat, I., Mouginot, J., Paden, J., Palmer, S., Rignot, E., and Steinhage, D.: A new bed elevation dataset for Greenland, *Cryosphere*, 7, 499–510, <https://doi.org/10.5194/tc-7-499-2013>, 2013.
- Box, J. E. and Decker, D. T.: Greenland marine-terminating glacier area changes: 2000–2010, *Annals of Glaciology*, 52, 91–98, <https://doi.org/10.3189/172756411799096312>, 2011.
- Bunce, C., Carr, J. R., Nienow, P. W., Ross, N., and Killick, R.: Ice front change of marine-terminating outlet glaciers in northwest and southeast Greenland during the 21st century, *Journal of Glaciology*, pp. 1–13, <https://doi.org/10.1017/jog.2018.44>, 2018.
- Carr, J. R., Vieli, A., and Stokes, C.: Influence of sea ice decline, atmospheric warming, and glacier width on marine-terminating outlet glacier behavior in northwest Greenland at seasonal to interannual timescales, *Journal of Geophysical Research: Earth Surface*, 118, 1210–1226, <https://doi.org/10.1002/jgrf.20088>, 2013.
- Carr, J. R., Stokes, C. R., and Vieli, A.: Threefold increase in marine-terminating outlet glacier retreat rates across the Atlantic Arctic: 1992–2010, *Annals of Glaciology*, 58, 72–91, <https://doi.org/10.1017/aog.2017.3>, 2017.
- Chu, W., Schroeder, D. M., Seroussi, H., Creyts, T. T., and Bell, R. E.: Complex Basal Thermal Transition Near the Onset of Petermann Glacier, Greenland, *Journal of Geophysical Research: Earth Surface*, pp. 985–995, <https://doi.org/10.1029/2017JF004561>, 2018.
- De Rydt, J., Gudmundsson, G. H., Rott, H., and Bamber, J. L.: Modeling the instantaneous response of glaciers after the collapse of the Larsen B Ice Shelf, *Geophysical Research Letters*, 42, 5355–5363, <https://doi.org/10.1002/2015GL064355>, 2015.
- Enderlin, E. M., Howat, I. M., Jeong, S., Noh, M. J., Van Angelen, J. H., and Van Den Broeke, M. R.: An improved mass budget for the Greenland ice sheet, *Geophysical Research Letters*, 41, 866–872, <https://doi.org/10.1002/2013GL059010>, 2014.
- Falkner, K. K., Melling, H., Mnchow, A. M., Box, J. E., Wohlleben, T., Johnson, H. L., Gudmandsen, P., Samelson, R., Copland, L., Steffen, K., Rignot, E., and Higgins, A. K.: Context for the recent massive petermann glacier calving event, *Eos*, 92, 117–118, <https://doi.org/10.1029/2011EO140001>, 2011.
- Geuzaine, C. and Remacle, J. F.: Gmsh: A 3-D finite element mesh generator with built-in pre- and post-processing facilities, *International Journal for Numerical Methods in Engineering*, 79, 1309–1331, <https://doi.org/10.1002/nme.2579>, 2009.
- Goldberg, D., Holland, D. M., and Schoof, C.: Grounding line movement and ice shelf buttressing in marine ice sheets, *Journal of Geophysical Research: Earth Surface*, 114, <https://doi.org/10.1029/2008JF001227>, 2009.
- Gregory, J. M., Huybrechts, P., and Raper, S. C. B.: Threatened loss of the Greenland ice-sheet, *Nature*, 428, 2513–2513, <https://doi.org/10.1038/nature02512>, 2004.
- Gudmundsson, G. H.: Ice-shelf buttressing and the stability of marine ice sheets, *Cryosphere*, 7, 647–655, <https://doi.org/10.5194/tc-7-647-2013>, 2013.

- Gudmundsson, G. H., Krug, J., Durand, G., Favier, L., and Gagliardini, O.: The stability of grounding lines on retrograde slopes, *Cryosphere*, 6, 1497–1505, <https://doi.org/10.5194/tc-6-1497-2012>, 2012.
- Haseloff, M. and Sergienko, O. V.: The effect of buttressing on grounding line dynamics, *Journal of Glaciology*, 64, 1–15, <https://doi.org/10.1017/jog.2018.30>, 2018.
- 5 Hill, E. A., Carr, J. R., and Stokes, C. R.: A Review of Recent Changes in Major Marine-Terminating Outlet Glaciers in Northern Greenland, *Frontiers in Earth Science*, 4, 1–23, <https://doi.org/10.3389/feart.2016.00111>, 2017.
- Hill, E. A., Carr, J. R., Stokes, C. R., and Gudmundsson, G. H.: Dynamic changes in outlet glaciers in northern Greenland from 1948 to 2015, *The Cryosphere*, 12, 3243–3263, <https://doi.org/10.5194/tc-12-3243-2018>, 2018.
- Holland, D. M., Thomas, R. H., de Young, B., Ribergaard, M. H., and Lyberth, B.: Acceleration of Jakobshavn Isbræ triggered by warm subsurface ocean waters, *Nature Geoscience*, 1, 659–664, <https://doi.org/10.1038/ngeo316>, 2008.
- 10 Howat, I. M.: MeaSURES Greenland Ice Velocity: Selected Glacier Site Velocity Maps from Optical Images, Version 2, National Snow and Ice Data Center Distributed Active Archive Center, <https://doi.org/10.5067/VM5DZ20MYF5C>, 2017.
- Howat, I. M., Joughin, I., Tulaczyk, S., and Gogineni, S.: Rapid retreat and acceleration of Helheim Glacier, east Greenland, *Geophysical Research Letters*, 32, 1–4, <https://doi.org/10.1029/2005GL024737>, 2005.
- 15 Howat, I. M., Joughin, I., and Scambos, T. A.: Rapid changes in ice discharge from Greenland outlet glaciers., *Science (New York, N.Y.)*, 315, 1559–61, <https://doi.org/10.1126/science.1138478>, <http://www.sciencemag.org/content/315/5818/1559.abstract>, 2007.
- Howat, I. M., Negrete, A., and Smith, B. E.: The Greenland Ice Mapping Project (GIMP) land classification and surface elevation data sets, *Cryosphere*, 8, 1509–1518, <https://doi.org/10.5194/tc-8-1509-2014>, 2014.
- Jakobsson, M., Hogan, K. A., Mayer, L. A., Mix, A., Jennings, A., Stoner, J., Eriksson, B., Jerram, K., Mohammad, R., Pearce, C., Reilly, B., and Stranne, C.: The Holocene retreat dynamics and stability of Petermann Glacier in northwest Greenland, *Nature Communications*, 9, <https://doi.org/10.1038/s41467-018-04573-2>, 2018.
- 20 Jensen, T. S., Box, J. E., and Hvidberg, C. S.: A sensitivity study of annual area change for Greenland ice sheet marine terminating outlet glaciers : 1999 – 2013, *Journal of Glaciology*, 62, 72–81, <https://doi.org/10.1017/jog.2016.12>, 2016.
- Johannessen, O. M., Babiker, M., and Miles, M. W.: Unprecedented retreat in a 50-year observational record for Petermann Glacier, North Greenland, *Atmospheric and Oceanic Science Letters*, 6, 259–265, <https://doi.org/10.3878/j.issn.1674-2834.13.0021>, 2013.
- 25 Joughin, I., Howat, I. M., Fahnestock, M., Smith, B., Krabill, W., Alley, R. B., Stern, H., and Truffer, M.: Continued evolution of Jakobshavn Isbrae following its rapid speedup, *Journal of Geophysical Research: Earth Surface*, 113, 1–14, <https://doi.org/10.1029/2008JF001023>, 2008.
- Joughin, I., Smith, B. E., Howat, I. M., Scambos, T., and Moon, T.: Greenland flow variability from ice-sheet-wide velocity mapping, *Journal of Glaciology*, 56, 415–430, <https://doi.org/10.3189/002214310792447734>, 2010.
- 30 Krabill, W., Abdalati, W., Frederick, E., Manizade, S., Martin, C., Sonntag, J., Swift, R., Thomas, R., Wright, W., and Yungel, J.: Greenland Ice Sheet: High-elevation balance and peripheral thinning, *Science*, 289, 428–430, <https://doi.org/10.1126/science.289.5478.428>, 2000.
- Lee, V., Cornford, S. L., and Payne, A. J.: Initialization of an ice-sheet model for present-day Greenland, *Annals of Glaciology*, 56, 129–140, <https://doi.org/10.3189/2015AoG70A121>, 2015.
- 35 Lemos, A., Shepherd, A., McMillan, M., Hogg, A. E., Hatton, E., and Joughin, I.: Ice velocity of Jakobshavn Isbræ, Petermann Glacier, Nioghalvfjærdsfjorden, and Zachariæ Isstrøm, 2015–2017, from Sentinel 1-a/b SAR imagery, *Cryosphere*, 12, 2087–2097, <https://doi.org/10.5194/tc-12-2087-2018>, 2018.

- MacAyeal, D. R.: Large-scale ice flow over a viscous basal sediment: Theory and application to ice stream B, Antarctica, *Journal of Geophysical Research: Solid Earth*, 94, 4071–4087, <https://doi.org/10.1029/JB094iB04p04071>, 1989.
- MacGregor, J. A., Fahnestock, M. A., Catania, G. A., Aschwanden, A., Clow, G. D., Colgan, W. T., Gogineni, S. P., Morlighem, M., Nowicki, S. M., Paden, J. D., Price, S. F., and Seroussi, H.: A synthesis of the basal thermal state of the Greenland Ice Sheet, *Journal of Geophysical Research: Earth Surface*, 121, 1328–1350, <https://doi.org/10.1002/2015JF003803>, 2016.
- Moon, T. and Joughin, I.: Changes in ice front position on Greenland’s outlet glaciers from 1992 to 2007, *Journal of Geophysical Research: Earth Surface*, 113, 1–10, <https://doi.org/10.1029/2007JF000927>, 2008.
- Moon, T., Joughin, I., Smith, B., and Howat, I.: 21st-Century Evolution of Greenland Outlet Glacier Velocities, *Science*, 336, 576–578, <https://doi.org/10.1126/science.1219985>, 2012.
- 10 Morland, L. W.: Unconfined Ice-Shelf Flow, in: *Dynamics of the West Antarctic Ice Sheet*, edited by der Veen, C. J. and Oerlemans, J., pp. 99–116, Springer Netherlands, Dordrecht, [https://doi.org/10.1007/978-94-009-3745-1\\_6](https://doi.org/10.1007/978-94-009-3745-1_6), 1987.
- Morlighem, M., Williams, C. N., Rignot, E., An, L., Arndt, J. E., Bamber, J. L., Catania, G., Chauché, N., Dowdeswell, J. A., Dorschel, B., Fenty, I., Hogan, K., Howat, I., Hubbard, A., Jakobsson, M., Jordan, T. M., Kjeldsen, K. K., Millan, R., Mayer, L., Mouginot, J., Noël, B. P., O’Cofaigh, C., Palmer, S., Rysgaard, S., Seroussi, H., Siegert, M. J., Slabon, P., Straneo, F., van den Broeke, M. R., Weinrebe, W., Wood, M., and Zinglensen, K. B.: BedMachine v3: Complete Bed Topography and Ocean Bathymetry Mapping of Greenland From Multibeam Echo Sounding Combined With Mass Conservation, *Geophysical Research Letters*, 44, 051–11, <https://doi.org/10.1002/2017GL074954>, 2017.
- 15 Mouginot, J., Rignot, E., Scheuchl, B., Fenty, I., Khazendar, A., Morlighem, M., Buzzi, A., and Paden, J.: Fast retreat of Zachariæ Isstrøm, northeast Greenland, *Science*, 350, 1357–1361, <https://doi.org/10.1126/science.aac7111>, 2015.
- 20 Münchow, A., Padman, L., and Fricker, H. A.: Interannual changes of the floating ice shelf of Petermann Gletscher, North Greenland, from 2000 to 2012, *Journal of Glaciology*, 60, 489–499, <https://doi.org/10.3189/2014JoG13J135>, 2014.
- Münchow, A., Padman, L., Washam, P., and Nicholls, K.: The Ice Shelf of Petermann Gletscher, North Greenland, and Its Connection to the Arctic and Atlantic Oceans, *Oceanography*, 29, 84–95, <https://doi.org/10.5670/oceanog.2016.101>, <https://tos.org/oceanography/article/the-ice-shelf-of-petermann-gletscher-north-greenland-and-its-connection-to>, 2016.
- 25 Nagler, T., Rott, H., Hetzenecker, M., Wuite, J., and Potin, P.: The Sentinel-1 Mission: New Opportunities for Ice Sheet Observations, *Remote Sensing*, 7, 9371–9389, <https://doi.org/10.3390/rs70709371>, 2015.
- Nagler, T., Hauglund, K., Forsberg, R., and Engdahl, M.: Product User Guide (PUG), vol. version 2., <http://www.esa-icesheets-cci.org/%0Ahttp://maps.elie.ucl.ac.be/CCI/viewer/download/ESACCI-LC-PUG-v2.5.pdf>, 2016.
- Nick, F. M., Vieli, A., Howat, I. M., and Joughin, I.: Large-scale changes in Greenland outlet glacier dynamics triggered at the terminus., *Nature Geoscience*, 2, 110–114, <https://doi.org/10.1038/ngeo394>, 2009.
- 30 Nick, F. M., Luckman, A., Vieli, A., Van Der Veen, C. J., Van As, D., Van De Wal, R. S. W., Pattyn, F., Hubbard, A. L., and Floricioiu, D.: The response of Petermann Glacier, Greenland, to large calving events, and its future stability in the context of atmospheric and oceanic warming, *Journal of Glaciology*, 58, 229–239, <https://doi.org/10.3189/2012JoG11J242>, 2012.
- Pegler, S. S.: The dynamics of confined extensional flows, *Journal of Fluid Mechanics*, 804, 24–57, <https://doi.org/10.1017/jfm.2016.516>, 2016.
- 35 Pegler, S. S., Kowal, K. N., Hasenclever, L. Q., and Grae Worster, M.: Lateral controls on grounding-line dynamics, *Journal of Fluid Mechanics*, 722, 1–12, <https://doi.org/10.1017/jfm.2013.140>, 2013.

- Porter, D. F., Tinto, K. J., Boghosian, A., Cochran, J. R., Bell, R. E., Manizade, S. S., and Sonntag, J. G.: Bathymetric control of tidewater glacier mass loss in northwest Greenland, *Earth and Planetary Science Letters*, 401, 40–46, <https://doi.org/10.1016/j.epsl.2014.05.058>, 2014.
- Pritchard, H. D., Arthern, R. J., Vaughan, D. G., and Edwards, L. A.: Extensive dynamic thinning on the margins of the Greenland and Antarctic ice sheets, *Nature*, 461, 971–975, <https://doi.org/10.1038/nature08471>, 2009.
- Rathmann, N. M., Hvidberg, C. S., Solgaard, A. M., Grinsted, A., Gudmundsson, G. H., Langen, P. L., Nielsen, K. P., and Kusk, A.: Highly temporally resolved response to seasonal surface melt of the Zachariae and 79N outlet glaciers in northeast Greenland, *Geophysical Research Letters*, 44, 9805–9814, <https://doi.org/10.1002/2017GL074368>, 2017.
- Raymond, C.: Shear margins in glaciers and ice sheets, *Journal of Glaciology*, 42, 90–102, <https://doi.org/10.3189/S0022143000030550>, 1996.
- Reeh, N., Thomsen, H. H., Higgins, A. K., and Weidick, A.: Sea ice and the stability of north and northeast Greenland floating glaciers, *Annals of Glaciology*, 33, 474–480, <https://doi.org/10.3189/172756401781818554>, 2001.
- Reese, R., Gudmundsson, G. H., Levermann, A., and Winkelmann, R.: The far reach of ice-shelf thinning in Antarctica, *Nature Climate Change*, 8, <https://doi.org/10.1038/s41558-017-0020-x>, 2018a.
- Reese, R., Winkelmann, R., and Gudmundsson, G. H.: Grounding-line flux formula applied as a flux condition in numerical simulations fails for buttressed Antarctic ice streams, *The Cryosphere*, 12, 3229–3242, <https://doi.org/10.5194/tc-12-3229-2018>, 2018b.
- Rignot, E. and Kanagaratnam, P.: Changes in the velocity structure of the Greenland Ice Sheet, *Science*, 311, 986–990, <https://doi.org/10.1126/science.1121381>, 2006.
- Rignot, E. and Steffen, K.: Channelized bottom melting and stability of floating ice shelves, *Geophysical Research Letters*, 35, 2–6, <https://doi.org/10.1029/2007GL031765>, 2008.
- Rignot, E., Gogineni, S., Joughin, I., and Krabill, W.: Contribution to the glaciology of northern Greenland from satellite radar interferometry, *Journal of Geophysical Research: Atmospheres*, 106, 007–34, <https://doi.org/10.1029/2001JD900071>, 2001.
- Rosenau, R., Scheinert, M., and Dietrich, R.: A processing system to monitor Greenland outlet glacier velocity variations at decadal and seasonal time scales utilizing the Landsat imagery, *Remote Sensing of Environment*, 169, 1–19, <https://doi.org/10.1016/j.rse.2015.07.012>, <http://dx.doi.org/10.1016/j.rse.2015.07.012>, 2015.
- Scambos, T. A., Bohlander, J. A., Shuman, C. A., and Skvarca, P.: Glacier acceleration and thinning after ice shelf collapse in the Larsen B embayment, Antarctica, *Geophysical Research Letters*, 31, 2001–2004, <https://doi.org/10.1029/2004GL020670>, 2004.
- Schoof, C.: Ice sheet grounding line dynamics : Steady states , stability , and hysteresis, 112, 1–19, <https://doi.org/10.1029/2006JF000664>, 2007.
- Schoof, C., Davis, A. D., and Popa, T. V.: Boundary layer models for calving marine outlet glaciers, *Cryosphere*, 11, 2283–2303, <https://doi.org/10.5194/tc-11-2283-2017>, 2017.
- Schwanghart, W. and Kuhn, N. J.: TopoToolbox: A set of Matlab functions for topographic analysis, *Environmental Modelling and Software*, 25, 770–781, <https://doi.org/10.1016/j.envsoft.2009.12.002>, 2010.
- Shroyer, E. L., Padman, L., Samelson, R. M., Münchow, A., and Stearns, L. A.: Seasonal control of Petermann Gletscher ice-shelf melt by the ocean’s response to sea-ice cover in Nares Strait, *Journal of Glaciology*, 63, 324–330, <https://doi.org/10.1017/jog.2016.140>, 2017.
- Straneo, F. and Heimbach, P.: North Atlantic warming and the retreat of Greenland’s outlet glaciers., *Nature*, 504, 36–43, <https://doi.org/10.1038/nature12854>, <http://www.ncbi.nlm.nih.gov/pubmed/24305146>, 2013.

van den Broeke, M. R., Enderlin, E. M., Howat, I. M., Kuipers Munneke, P., Noël, B. P. Y., Jan Van De Berg, W., Van Meijgaard, E., and Wouters, B.: On the recent contribution of the Greenland ice sheet to sea level change, *Cryosphere*, 10, 1933–1946, <https://doi.org/10.5194/tc-10-1933-2016>, 2016.

Wilson, N., Straneo, F., and Heimbach, P.: Satellite-derived submarine melt rates and mass balance (2011-2015) for Greenland’s largest remaining ice tongues, *Cryosphere*, 11, 2773–2782, <https://doi.org/10.5194/tc-11-2773-2017>, 2017.
